# Supplementary material for: Extracting the femtometer structure of strange baryons using the vacuum polarization effect
Source: PubMed Central journal article supplement (PMC11470094; doi:10.1038/s41467-024-51802-y), 2024-10-11
Supplement: 41467_2024_51802_MOESM1_ESM.pdf [file 41467_2024_51802_MOESM1_ESM.pdf]

# Extracting the femtometer structure of strange baryons using the vacuum polarization effect

The BESIII Collaboration\*  
(Dated: July 11, 2024)

## Supplementary Information

Figures and Tables used in paper are listed accordingly.

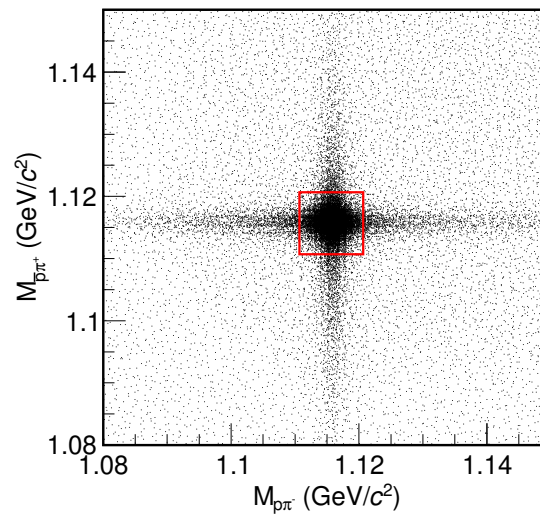

**Supplementary Fig. 1 | Distribution of  $M_{p\pi^-}$  versus  $M_{\bar{p}\pi^+}$  of the accepted candidates from data.** The red box denotes the signal region. The clusters of  $\Lambda$  and  $\bar{\Lambda}$  are clearly observed.

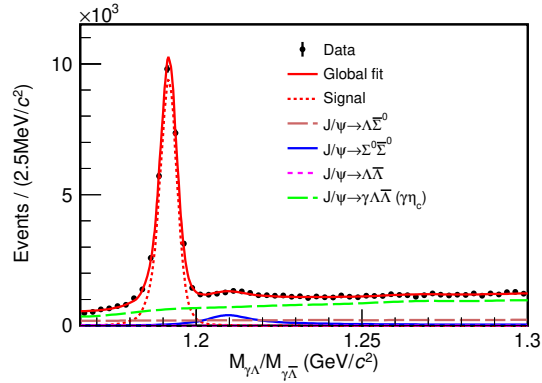

**Supplementary Fig. 2 | Fit to the  $M_{\gamma\Lambda}/M_{\gamma\bar{\Lambda}}$  distribution of the accepted candidates from  $J/\psi$  data.** The black points with error bars are data, the red curve is the global fit, the red dotted curve is the  $\Sigma^0/\bar{\Sigma}^0$  signal, the brown long-dashed curve shows the background from the conjugate channel, the blue curve is from  $J/\psi \rightarrow \Sigma^0 \bar{\Sigma}^0$ , the pink dotted curve is from  $J/\psi \rightarrow \Lambda \bar{\Lambda}$  and the green long-dashed curve is from  $J/\psi \rightarrow \gamma \Lambda \bar{\Lambda} (\gamma \eta_c)$ .

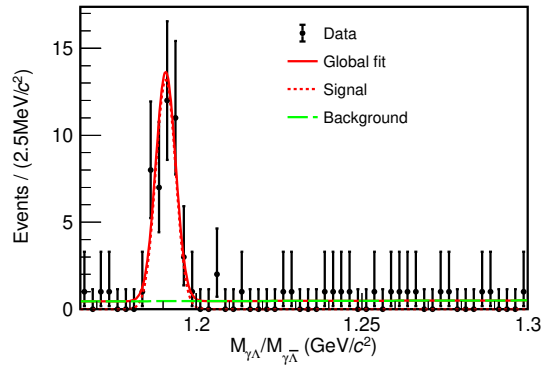

**Supplementary Fig. 3 | Fit to the  $M_{\gamma\Lambda}/M_{\gamma\bar{\Lambda}}$  distribution from the QED background.** The black points with error bars are data, the red curve is the global fit, the red dotted curve is the signal shape described by a Breit-Wigner shape convolved with a Gaussian function and the green long-dashed curve is from the background described with a first-order Chebychev function.

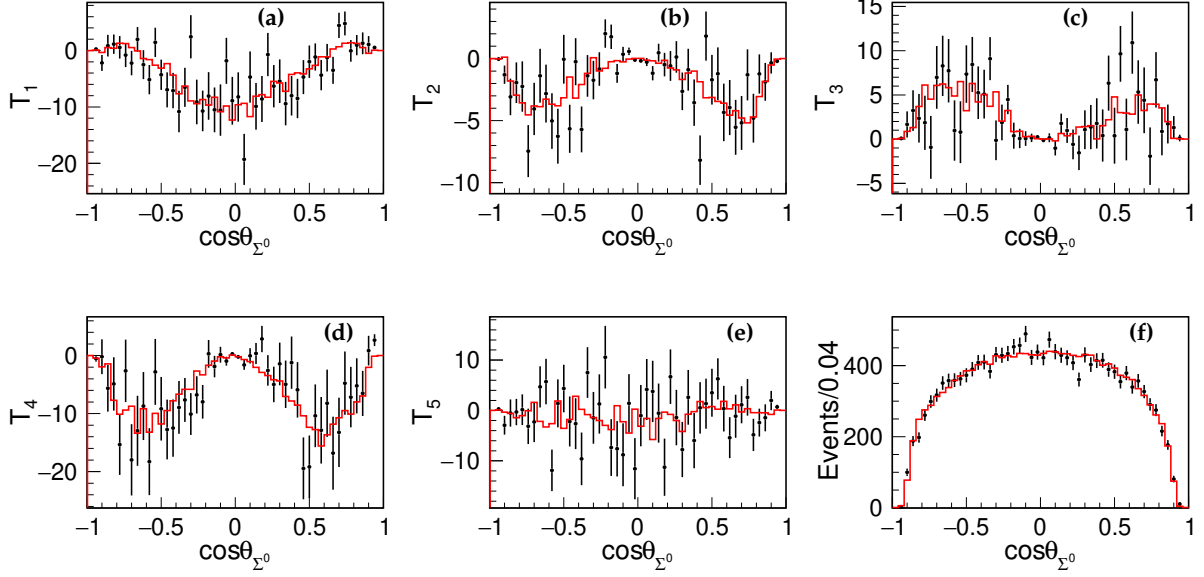

**Supplementary Fig. 4 | Fit results compared with data of  $e^+e^- \rightarrow J/\psi \rightarrow \bar{\Lambda}(\rightarrow \bar{p}\pi^+) \Sigma^0(\rightarrow \gamma\Lambda)$  process. (a)-(e) are the moments  $T_1$ - $T_5$  respectively and (f) is the  $\Sigma^0$  angular distribution. The black points with error bars are data and the red curve is the global fit.**

**Supplementary Table 1 | Systematic uncertainties for the parameters measurement.**

| Source                                 | $\alpha_{J/\psi}$ | $\Delta\Phi_{\bar{\Lambda}\Sigma^0}$ (rad) | $\Delta\Phi_{\Lambda\Sigma^0}$ (rad) |
|----------------------------------------|-------------------|--------------------------------------------|--------------------------------------|
| $\Lambda/\bar{\Lambda}$ reconstruction | 0.0047            | 0.0038                                     | 0.0036                               |
| Kinematic fit                          | 0.0010            | 0.0040                                     | 0.0049                               |
| Background estimate                    | 0.0083            | 0.0065                                     | 0.0070                               |
| $\alpha_{\Lambda/\bar{\Lambda}}$       | 0.0000            | 0.0050                                     | 0.0019                               |
| Total                                  | 0.014             | 0.010                                      | 0.010                                |

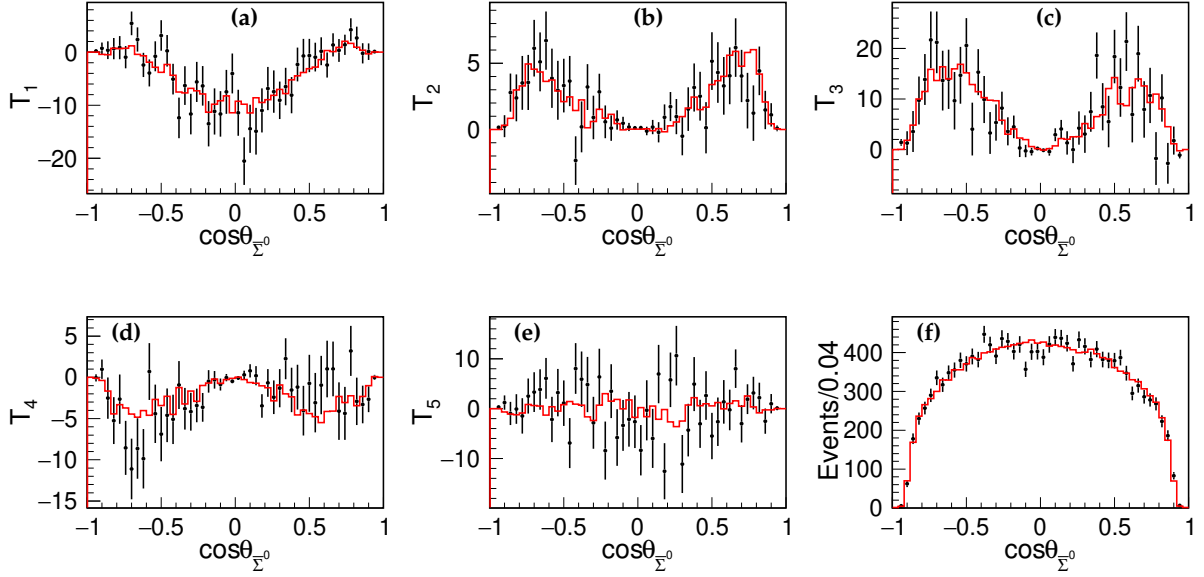

**Supplementary Fig. 5 | Fit results compared with data of  $e^+e^- \rightarrow J/\psi \rightarrow \Lambda(\rightarrow p\pi^-) \bar{\Sigma}^0(\rightarrow \gamma\bar{\Lambda})$  process. (a)-(e) is the moments  $T_1$ - $T_5$  respectively and (f) is the  $\bar{\Sigma}^0$  angular distribution. The black points with error bars are data and the red curve is the global fit**

## The BESIII Collaboration

M. Ablikim<sup>1</sup>, M. N. Achasov<sup>12,b</sup>, P. Adlarson<sup>72</sup>, M. Albrecht<sup>4</sup>, R. Aliberti<sup>33</sup>, A. Amoroso<sup>71A,71C</sup>, M. R. An<sup>37</sup>, Q. An<sup>68,55</sup>, Y. Bai<sup>54</sup>, O. Bakina<sup>34</sup>, R. Baldini Ferroli<sup>27A</sup>, I. Balossino<sup>28A</sup>, Y. Ban<sup>44,g</sup>, V. Batzskaya<sup>1,42</sup>, D. Becker<sup>33</sup>, K. Begzsuren<sup>30</sup>, N. Berger<sup>33</sup>, M. Bertani<sup>27A</sup>, D. Bettoni<sup>28A</sup>, F. Bianchi<sup>71A,71C</sup>, E. Bianco<sup>71A,71C</sup>, J. Bloms<sup>65</sup>, A. Bortone<sup>71A,71C</sup>, I. Boyko<sup>34</sup>, R. A. Briere<sup>5</sup>, A. Brueggemann<sup>65</sup>, H. Cai<sup>73</sup>, X. Cai<sup>1,55</sup>, A. Calcaterra<sup>27A</sup>, G. F. Cao<sup>1,60</sup>, N. Cao<sup>1,60</sup>, S. A. Cetin<sup>59A</sup>, J. F. Chang<sup>1,55</sup>, W. L. Chang<sup>1,60</sup>, G. R. Che<sup>41</sup>, G. Chelkov<sup>34,a</sup>, C. Chen<sup>41</sup>, Chao Chen<sup>52</sup>, G. Chen<sup>1</sup>, H. S. Chen<sup>1,60</sup>, M. L. Chen<sup>1,55,60</sup>, S. J. Chen<sup>40</sup>, S. M. Chen<sup>58</sup>, T. Chen<sup>1,60</sup>, X. R. Chen<sup>29,60</sup>, X. T. Chen<sup>1,60</sup>, Y. B. Chen<sup>1,55</sup>, Z. J. Chen<sup>24,h</sup>, W. S. Cheng<sup>71C</sup>, S. K. Choi<sup>52</sup>, X. Chu<sup>41</sup>, G. Cibinetto<sup>28A</sup>, F. Cossio<sup>71C</sup>, J. J. Cui<sup>47</sup>, H. L. Dai<sup>1,55</sup>, J. P. Dai<sup>76</sup>, A. Dbeyssi<sup>18</sup>, R. E. de Boer<sup>4</sup>, D. Dedovich<sup>34</sup>, Z. Y. Deng<sup>1</sup>, A. Denig<sup>33</sup>, I. Denysenko<sup>34</sup>, M. Destefanis<sup>71A,71C</sup>, F. De Mori<sup>71A,71C</sup>, Y. Ding<sup>32</sup>, Y. Ding<sup>38</sup>, J. Dong<sup>1,55</sup>, L. Y. Dong<sup>1,60</sup>, M. Y. Dong<sup>1,55,60</sup>, X. Dong<sup>73</sup>, S. X. Du<sup>78</sup>, Z. H. Duan<sup>40</sup>, P. Egorov<sup>34,a</sup>, Y. L. Fan<sup>73</sup>, J. Fang<sup>1,55</sup>, S. S. Fang<sup>1,60</sup>, W. X. Fang<sup>1</sup>, Y. Fang<sup>1</sup>, R. Farinelli<sup>28A</sup>, L. Fava<sup>71B,71C</sup>, F. Feldbauer<sup>4</sup>, G. Felici<sup>27A</sup>, C. Q. Feng<sup>68,55</sup>, J. H. Feng<sup>56</sup>, K. Fischer<sup>66</sup>, M. Fritsch<sup>4</sup>, C. Fritsch<sup>65</sup>, C. D. Fu<sup>1</sup>, H. Gao<sup>60</sup>, Y. N. Gao<sup>44,g</sup>, Yang Gao<sup>68,55</sup>, S. Garbolino<sup>71C</sup>, I. Garzia<sup>28A,28B</sup>, P. T. Ge<sup>73</sup>, Z. W. Ge<sup>40</sup>, C. Geng<sup>56</sup>, E. M. Gersabeck<sup>64</sup>, A. Gilman<sup>66</sup>, K. Goetzen<sup>13</sup>, L. Gong<sup>38</sup>, W. X. Gong<sup>1,55</sup>, W. Gradl<sup>33</sup>, M. Greco<sup>71A,71C</sup>, L. M. Gu<sup>40</sup>, M. H. Gu<sup>1,55</sup>, Y. T. Gu<sup>15</sup>, C. Y. Guan<sup>1,60</sup>, A. Q. Guo<sup>29,60</sup>, L. B. Guo<sup>39</sup>, R. P. Guo<sup>46</sup>, Y. P. Guo<sup>11,f</sup>, A. Guskov<sup>34,a</sup>, W. Y. Han<sup>37</sup>, X. Q. Hao<sup>19</sup>, F. A. Harris<sup>62</sup>, K. K. He<sup>52</sup>, K. L. He<sup>1,60</sup>, F. H. Heinsius<sup>4</sup>, C. H. Heinz<sup>33</sup>, Y. K. Heng<sup>1,55,60</sup>, C. Herold<sup>57</sup>, G. Y. Hou<sup>1,60</sup>, Y. R. Hou<sup>60</sup>, Z. L. Hou<sup>1</sup>, H. M. Hu<sup>1,60</sup>, J. F. Hu<sup>53,i</sup>, T. Hu<sup>1,55,60</sup>, Y. Hu<sup>1</sup>, G. S. Huang<sup>68,55</sup>, K. X. Huang<sup>56</sup>, L. Q. Huang<sup>29,60</sup>, X. T. Huang<sup>47</sup>, Y. P. Huang<sup>1</sup>, Z. Huang<sup>44,g</sup>, T. Hussain<sup>70</sup>, N. Hüsken<sup>26,33</sup>, W. Imoehl<sup>26</sup>, M. Irshad<sup>68,55</sup>, J. Jackson<sup>26</sup>, S. Jaeger<sup>4</sup>, S. Janchiv<sup>30</sup>, E. Jang<sup>52</sup>, J. H. Jeong<sup>52</sup>, Q. Ji<sup>1</sup>, Q. P. Ji<sup>19</sup>, X. B. Ji<sup>1,60</sup>, X. L. Ji<sup>1,55</sup>, Y. Y. Ji<sup>47</sup>, Z. K. Jia<sup>68,55</sup>, P. C. Jiang<sup>44,g</sup>, S. S. Jiang<sup>37</sup>, X. S. Jiang<sup>1,55,60</sup>, Y. Jiang<sup>60</sup>, J. B. Jiao<sup>47</sup>, Z. Jiao<sup>22</sup>, S. Jin<sup>40</sup>, Y. Jin<sup>63</sup>, M. Q. Jing<sup>1,60</sup>, T. Johansson<sup>72</sup>, S. Kabana<sup>31</sup>, N. Kalantar-Nayestanaki<sup>61</sup>, X. L. Kang<sup>9</sup>, X. S. Kang<sup>38</sup>, R. Kappert<sup>61</sup>, M. Kavatsyuk<sup>61</sup>, B. C. Ke<sup>78</sup>, I. K. Keshk<sup>4</sup>, A. Khoukaz<sup>65</sup>, R. Kiuchi<sup>1</sup>, R. Kliemt<sup>13</sup>, L. Koch<sup>35</sup>, O. B. Kolcu<sup>59A</sup>, B. Kopf<sup>4</sup>, M. Kuemmel<sup>4</sup>, M. Kuessner<sup>4</sup>, A. Kupsc<sup>42,72</sup>, W. Kühn<sup>35</sup>, J. J. Lane<sup>64</sup>, J. S. Lange<sup>35</sup>, P. Larin<sup>18</sup>, A. Lavania<sup>25</sup>, L. Lavezzi<sup>71A,71C</sup>, T. T. Lei<sup>68,k</sup>, Z. H. Lei<sup>68,55</sup>, H. Leithoff<sup>33</sup>, M. Lellmann<sup>33</sup>, T. Lenz<sup>33</sup>, C. Li<sup>45</sup>, C. Li<sup>41</sup>, C. H. Li<sup>37</sup>, Cheng Li<sup>68,55</sup>, D. M. Li<sup>78</sup>, F. Li<sup>1,55</sup>, G. Li<sup>1</sup>, H. Li<sup>49</sup>, H. Li<sup>68,55</sup>, H. B. Li<sup>1,60</sup>, H. J. Li<sup>19</sup>, H. N. Li<sup>53,i</sup>, J. Q. Li<sup>4</sup>, J. S. Li<sup>56</sup>, J. W. Li<sup>47</sup>, Ke Li<sup>1</sup>, L. J Li<sup>1,60</sup>, L. K. Li<sup>1</sup>, Lei Li<sup>3</sup>, M. H. Li<sup>41</sup>, P. R. Li<sup>36,j,k</sup>, S. X. Li<sup>11</sup>, S. Y. Li<sup>58</sup>, T. Li<sup>47</sup>, W. D. Li<sup>1,60</sup>, W. G. Li<sup>1</sup>, X. H. Li<sup>68,55</sup>, X. L. Li<sup>47</sup>, Xiaoyu Li<sup>1,60</sup>, Y. G. Li<sup>44,g</sup>, Z. X. Li<sup>15</sup>, Z. Y. Li<sup>56</sup>, C. Liang<sup>40</sup>, H. Liang<sup>1,60</sup>, H. Liang<sup>68,55</sup>, H. Liang<sup>32</sup>, Y. F. Liang<sup>51</sup>, Y. T. Liang<sup>29,60</sup>, G. R. Liao<sup>14</sup>, L. Z. Liao<sup>47</sup>, J. Libby<sup>25</sup>, A. Limphirat<sup>57</sup>, C. X. Lin<sup>56</sup>, D. X. Lin<sup>29,60</sup>, T. Lin<sup>1</sup>, B. J. Liu<sup>1</sup>, C. Liu<sup>32</sup>, C. X. Liu<sup>1</sup>, D. Liu<sup>18,68</sup>, F. H. Liu<sup>50</sup>, Fang Liu<sup>1</sup>, Feng Liu<sup>6</sup>, G. M. Liu<sup>53,i</sup>, H. Liu<sup>36,j,k</sup>, H. B. Liu<sup>15</sup>, H. M. Liu<sup>1,60</sup>, Huanhuan Liu<sup>1</sup>, Huihui Liu<sup>20</sup>, J. B. Liu<sup>68,55</sup>, J. L. Liu<sup>69</sup>, J. Y. Liu<sup>1,60</sup>, K. Liu<sup>1</sup>, K. Y. Liu<sup>38</sup>, Ke Liu<sup>21</sup>, L. Liu<sup>68,55</sup>, Lu Liu<sup>41</sup>, M. H. Liu<sup>11,f</sup>, P. L. Liu<sup>1</sup>, Q. Liu<sup>60</sup>, S. B. Liu<sup>68,55</sup>, T. Liu<sup>11,f</sup>, W. K. Liu<sup>41</sup>, W. M. Liu<sup>68,55</sup>, X. Liu<sup>36,j,k</sup>, Y. Liu<sup>36,j,k</sup>, Y. B. Liu<sup>41</sup>, Z. A. Liu<sup>1,55,60</sup>, Z. Q. Liu<sup>47</sup>, X. C. Lou<sup>1,55,60</sup>, F. X. Lu<sup>56</sup>, H. J. Lu<sup>22</sup>, J. G. Lu<sup>1,55</sup>, X. L. Lu<sup>1</sup>, Y. Lu<sup>7</sup>, Y. P. Lu<sup>1,55</sup>, Z. H. Lu<sup>1,60</sup>, C. L. Luo<sup>39</sup>, M. X. Luo<sup>77</sup>, T. Luo<sup>11,f</sup>, X. L. Luo<sup>1,55</sup>, X. R. Lyu<sup>60</sup>, Y. F. Lyu<sup>41</sup>, F. C. Ma<sup>38</sup>, H. L. Ma<sup>1</sup>, L. L. Ma<sup>47</sup>, M. M. Ma<sup>1,60</sup>, Q. M. Ma<sup>1</sup>, R. Q. Ma<sup>1,60</sup>, R. T. Ma<sup>60</sup>, X. Y. Ma<sup>1,55</sup>, Y. Ma<sup>44,g</sup>, F. E. Maas<sup>18</sup>, M. Maggiora<sup>71A,71C</sup>, S. Maldaner<sup>4</sup>, S. Malde<sup>66</sup>, Q. A. Malik<sup>70</sup>, A. Mangoni<sup>27B</sup>, Y. J. Mao<sup>44,g</sup>, Z. P. Mao<sup>1</sup>, S. Marcello<sup>71A,71C</sup>, Z. X. Meng<sup>63</sup>, J. G. Messchendorp<sup>13,61</sup>, G. Mezzadri<sup>28A</sup>, H. Miao<sup>1,60</sup>, T. J. Min<sup>40</sup>, R. E. Mitchell<sup>26</sup>, X. H. Mo<sup>1,55,60</sup>, N. Yu. Muchnoi<sup>12,b</sup>

Y. Nefedov<sup>34</sup>, F. Nerling<sup>18,d</sup>, I. B. Nikolaev<sup>12,b</sup>, Z. Ning<sup>1,55</sup>, S. Nisar<sup>10,l</sup>, Y. Niu<sup>47</sup>, S. L. Olsen<sup>60</sup>, Q. Ouyang<sup>1,55,60</sup>, S. Pacetti<sup>27B,27C</sup>, X. Pan<sup>52</sup>, Y. Pan<sup>54</sup>, A. Pathak<sup>32</sup>, Y. P. Pei<sup>68,55</sup>, M. Pelizaeus<sup>4</sup>, H. P. Peng<sup>68,55</sup>, K. Peters<sup>13,d</sup>, J. L. Ping<sup>39</sup>, R. G. Ping<sup>1,60</sup>, S. Plura<sup>33</sup>, S. Pogodin<sup>34</sup>, V. Prasad<sup>68,55</sup>, F. Z. Qi<sup>1</sup>, H. Qi<sup>68,55</sup>, H. R. Qi<sup>58</sup>, M. Qi<sup>40</sup>, T. Y. Qi<sup>11,f</sup>, S. Qian<sup>1,55</sup>, W. B. Qian<sup>60</sup>, Z. Qian<sup>56</sup>, C. F. Qiao<sup>60</sup>, J. J. Qin<sup>69</sup>, L. Q. Qin<sup>14</sup>, X. P. Qin<sup>11,f</sup>, X. S. Qin<sup>47</sup>, Z. H. Qin<sup>1,55</sup>, J. F. Qiu<sup>1</sup>, S. Q. Qu<sup>58</sup>, K. H. Rashid<sup>70</sup>, C. F. Redmer<sup>33</sup>, K. J. Ren<sup>37</sup>, A. Rivetti<sup>71C</sup>, V. Rodin<sup>61</sup>, M. Rolo<sup>71C</sup>, G. Rong<sup>1,60</sup>, Ch. Rosner<sup>18</sup>, S. N. Ruan<sup>41</sup>, A. Sarantsev<sup>34,c</sup>, Y. Schelhaas<sup>33</sup>, C. Schnier<sup>4</sup>, K. Schoenning<sup>72</sup>, M. Scodeggio<sup>28A,28B</sup>, K. Y. Shan<sup>11,f</sup>, W. Shan<sup>23</sup>, X. Y. Shan<sup>68,55</sup>, J. F. Shangguan<sup>52</sup>, L. G. Shao<sup>1,60</sup>, M. Shao<sup>68,55</sup>, C. P. Shen<sup>11,f</sup>, H. F. Shen<sup>1,60</sup>, W. H. Shen<sup>60</sup>, X. Y. Shen<sup>1,60</sup>, B. A. Shi<sup>60</sup>, H. C. Shi<sup>68,55</sup>, J. Y. Shi<sup>1</sup>, Q. Q. Shi<sup>52</sup>, R. S. Shi<sup>1,60</sup>, X. Shi<sup>1,55</sup>, J. J. Song<sup>19</sup>, W. M. Song<sup>32,1</sup>, Y. X. Song<sup>44,g</sup>, S. Sosio<sup>71A,71C</sup>, S. Spataro<sup>71A,71C</sup>, F. Stieler<sup>33</sup>, P. P. Su<sup>52</sup>, Y. J. Su<sup>60</sup>, G. X. Sun<sup>1</sup>, H. Sun<sup>60</sup>, H. K. Sun<sup>1</sup>, J. F. Sun<sup>19</sup>, L. Sun<sup>73</sup>, S. S. Sun<sup>1,60</sup>, T. Sun<sup>1,60</sup>, W. Y. Sun<sup>32</sup>, Y. J. Sun<sup>68,55</sup>, Y. Z. Sun<sup>1</sup>, Z. T. Sun<sup>47</sup>, Y. X. Tan<sup>68,55</sup>, C. J. Tang<sup>51</sup>, G. Y. Tang<sup>1</sup>, J. Tang<sup>56</sup>, L. Y. Tao<sup>69</sup>, Q. T. Tao<sup>24,h</sup>, M. Tat<sup>66</sup>, J. X. Teng<sup>68,55</sup>, V. Thoren<sup>72</sup>, W. H. Tian<sup>49</sup>, Y. Tian<sup>29,60</sup>, I. Uman<sup>59B</sup>, B. Wang<sup>1</sup>, B. Wang<sup>68,55</sup>, B. L. Wang<sup>60</sup>, C. W. Wang<sup>40</sup>, D. Y. Wang<sup>44,g</sup>, F. Wang<sup>69</sup>, H. J. Wang<sup>36,j,k</sup>, H. P. Wang<sup>1,60</sup>, K. Wang<sup>1,55</sup>, L. L. Wang<sup>1</sup>, M. Wang<sup>47</sup>, M. Z. Wang<sup>44,g</sup>, Meng Wang<sup>1,60</sup>, S. Wang<sup>14</sup>, S. Wang<sup>11,f</sup>, T. Wang<sup>11,f</sup>, T. J. Wang<sup>41</sup>, W. Wang<sup>56</sup>, W. H. Wang<sup>73</sup>, W. P. Wang<sup>68,55</sup>, X. Wang<sup>44,g</sup>, X. F. Wang<sup>36,j,k</sup>, X. L. Wang<sup>11,f</sup>, Y. Wang<sup>58</sup>, Y. D. Wang<sup>43</sup>, Y. F. Wang<sup>1,55,60</sup>, Y. H. Wang<sup>45</sup>, Y. Q. Wang<sup>1</sup>, Yaqian Wang<sup>17,1</sup>, Z. Wang<sup>1,55</sup>, Z. Y. Wang<sup>1,60</sup>, Ziyi Wang<sup>60</sup>, D. H. Wei<sup>14</sup>, F. Weidner<sup>65</sup>, S. P. Wen<sup>1</sup>, D. J. White<sup>64</sup>, U. Wiedner<sup>4</sup>, G. Wilkinson<sup>66</sup>, M. Wolke<sup>72</sup>, L. Wollenberg<sup>4</sup>, J. F. Wu<sup>1,60</sup>, L. H. Wu<sup>1</sup>, L. J. Wu<sup>1,60</sup>, X. Wu<sup>11,f</sup>, X. H. Wu<sup>32</sup>, Y. Wu<sup>68</sup>, Y. J. Wu<sup>29</sup>, Z. Wu<sup>1,55</sup>, L. Xia<sup>68,55</sup>, T. Xiang<sup>44,g</sup>, D. Xiao<sup>36,j,k</sup>, G. Y. Xiao<sup>40</sup>, H. Xiao<sup>11,f</sup>, S. Y. Xiao<sup>1</sup>, Y. L. Xiao<sup>11,f</sup>, Z. J. Xiao<sup>39</sup>, C. Xie<sup>40</sup>, X. H. Xie<sup>44,g</sup>, Y. Xie<sup>47</sup>, Y. G. Xie<sup>1,55</sup>, Y. H. Xie<sup>6</sup>, Z. P. Xie<sup>68,55</sup>, T. Y. Xing<sup>1,60</sup>, C. F. Xu<sup>1,60</sup>, C. J. Xu<sup>56</sup>, G. F. Xu<sup>1</sup>, H. Y. Xu<sup>63</sup>, Q. J. Xu<sup>16</sup>, X. P. Xu<sup>52</sup>, Y. C. Xu<sup>75</sup>, Z. P. Xu<sup>40</sup>, F. Yan<sup>11,f</sup>, L. Yan<sup>11,f</sup>, W. B. Yan<sup>68,55</sup>, W. C. Yan<sup>78</sup>, H. J. Yang<sup>48,e</sup>, H. L. Yang<sup>32</sup>, H. X. Yang<sup>1</sup>, S. L. Yang<sup>1,60</sup>, Tao Yang<sup>1</sup>, Y. F. Yang<sup>41</sup>, Y. X. Yang<sup>1,60</sup>, Yifan Yang<sup>1,60</sup>, M. Ye<sup>1,55</sup>, M. H. Ye<sup>8</sup>, J. H. Yin<sup>1</sup>, Z. Y. You<sup>56</sup>, B. X. Yu<sup>1,55,60</sup>, C. X. Yu<sup>41</sup>, G. Yu<sup>1,60</sup>, T. Yu<sup>69</sup>, X. D. Yu<sup>44,g</sup>, C. Z. Yuan<sup>1,60</sup>, L. Yuan<sup>2</sup>, S. C. Yuan<sup>1</sup>, X. Q. Yuan<sup>1</sup>, Y. Yuan<sup>1,60</sup>, Z. Y. Yuan<sup>56</sup>, C. X. Yue<sup>37</sup>, A. A. Zafar<sup>70</sup>, F. R. Zeng<sup>47</sup>, X. Zeng<sup>6</sup>, Y. Zeng<sup>24,h</sup>, X. Y. Zhai<sup>32</sup>, Y. H. Zhan<sup>56</sup>, A. Q. Zhang<sup>1,60</sup>, B. L. Zhang<sup>1,60</sup>, B. X. Zhang<sup>1</sup>, D. H. Zhang<sup>41</sup>, G. Y. Zhang<sup>19</sup>, H. Zhang<sup>68</sup>, H. H. Zhang<sup>32</sup>, H. H. Zhang<sup>56</sup>, H. Q. Zhang<sup>1,55,60</sup>, H. Y. Zhang<sup>1,55</sup>, J. L. Zhang<sup>74</sup>, J. Q. Zhang<sup>39</sup>, J. W. Zhang<sup>1,55,60</sup>, J. X. Zhang<sup>36,j,k</sup>, J. Y. Zhang<sup>1</sup>, J. Z. Zhang<sup>1,60</sup>, Jianyu Zhang<sup>1,60</sup>, Jiawei Zhang<sup>1,60</sup>, L. M. Zhang<sup>58</sup>, L. Q. Zhang<sup>56</sup>, Lei Zhang<sup>40</sup>, P. Zhang<sup>1</sup>, Q. Y. Zhang<sup>37,78</sup>, Shuihan Zhang<sup>1,60</sup>, Shulei Zhang<sup>24,h</sup>, X. D. Zhang<sup>43</sup>, X. M. Zhang<sup>1</sup>, X. Y. Zhang<sup>47</sup>, X. Y. Zhang<sup>52</sup>, Y. Zhang<sup>66</sup>, Y. T. Zhang<sup>78</sup>, Y. H. Zhang<sup>1,55</sup>, Yan Zhang<sup>68,55</sup>, Yao Zhang<sup>1</sup>, Z. H. Zhang<sup>1</sup>, Z. L. Zhang<sup>32</sup>, Z. Y. Zhang<sup>41</sup>, Z. Y. Zhang<sup>73</sup>, G. Zhao<sup>1</sup>, J. Zhao<sup>37</sup>, J. Y. Zhao<sup>1,60</sup>, J. Z. Zhao<sup>1,55</sup>, Lei Zhao<sup>68,55</sup>, Ling Zhao<sup>1</sup>, M. G. Zhao<sup>41</sup>, S. J. Zhao<sup>78</sup>, Y. B. Zhao<sup>1,55</sup>, Y. X. Zhao<sup>29,60</sup>, Z. G. Zhao<sup>68,55</sup>, A. Zhemchugov<sup>34,a</sup>, B. Zheng<sup>69</sup>, J. P. Zheng<sup>1,55</sup>, W. J. Zheng<sup>1,60</sup>, Y. H. Zheng<sup>60</sup>, B. Zhong<sup>39</sup>, C. Zhong<sup>69</sup>, X. Zhong<sup>56</sup>, H. Zhou<sup>47</sup>, L. P. Zhou<sup>1,60</sup>, X. Zhou<sup>73</sup>, X. K. Zhou<sup>60</sup>, X. R. Zhou<sup>68,55</sup>, X. Y. Zhou<sup>37</sup>, Y. Z. Zhou<sup>11,f</sup>, J. Zhu<sup>41</sup>, K. Zhu<sup>1</sup>, K. J. Zhu<sup>1,55,60</sup>, L. X. Zhu<sup>60</sup>, S. H. Zhu<sup>67</sup>, S. Q. Zhu<sup>40</sup>, T. J. Zhu<sup>74</sup>, W. J. Zhu<sup>11,f</sup>, Y. C. Zhu<sup>68,55</sup>, Z. A. Zhu<sup>1,60</sup>, J. H. Zou<sup>1</sup>, J. Zu<sup>68,55</sup>

<sup>1</sup> Institute of High Energy Physics, Beijing 100049, People's Republic of China. <sup>2</sup> Beihang University, Beijing 100191, People's Republic of China. <sup>3</sup> Beijing Institute of Petrochemical Technology, Beijing 102617, People's Republic of China. <sup>4</sup> Bochum Ruhr-University, D-44780 Bochum, Germany. <sup>5</sup> Carnegie Mellon University, Pittsburgh, Pennsylvania 15213, USA. <sup>6</sup> Central China

Normal University, Wuhan 430079, People's Republic of China. <sup>7</sup> Central South University, Changsha 410083, People's Republic of China. <sup>8</sup> China Center of Advanced Science and Technology, Beijing 100190, People's Republic of China. <sup>9</sup> China University of Geosciences, Wuhan 430074, People's Republic of China. <sup>10</sup> COMSATS University Islamabad, Lahore Campus, Defence Road, Off Raiwind Road, 54000 Lahore, Pakistan. <sup>11</sup> Fudan University, Shanghai 200433, People's Republic of China. <sup>12</sup> G.I. Budker Institute of Nuclear Physics SB RAS (BINP), Novosibirsk 630090, Russia. <sup>13</sup> GSI Helmholtzcentre for Heavy Ion Research GmbH, D-64291 Darmstadt, Germany. <sup>14</sup> Guangxi Normal University, Guilin 541004, People's Republic of China. <sup>15</sup> Guangxi University, Nanning 530004, People's Republic of China. <sup>16</sup> Hangzhou Normal University, Hangzhou 310036, People's Republic of China. <sup>17</sup> Hebei University, Baoding 071002, People's Republic of China. <sup>18</sup> Helmholtz Institute Mainz, Staudinger Weg 18, D-55099 Mainz, Germany. <sup>19</sup> Henan Normal University, Xinxiang 453007, People's Republic of China. <sup>20</sup> Henan University of Science and Technology, Luoyang 471003, People's Republic of China. <sup>21</sup> Henan University of Technology, Zhengzhou 450001, People's Republic of China. <sup>22</sup> Huangshan College, Huangshan 245000, People's Republic of China. <sup>23</sup> Hunan Normal University, Changsha 410081, People's Republic of China. <sup>24</sup> Hunan University, Changsha 410082, People's Republic of China. <sup>25</sup> Indian Institute of Technology Madras, Chennai 600036, India. <sup>26</sup> Indiana University, Bloomington, Indiana 47405, USA. <sup>27</sup> INFN Laboratori Nazionali di Frascati, (A)INFN Laboratori Nazionali di Frascati, I-00044, Frascati, Italy; (B)INFN Sezione di Perugia, I-06100, Perugia, Italy; (C)University of Perugia, I-06100, Perugia, Italy. <sup>28</sup> INFN Sezione di Ferrara, (A)INFN Sezione di Ferrara, I-44122, Ferrara, Italy; (B)University of Ferrara, I-44122, Ferrara, Italy. <sup>29</sup> Institute of Modern Physics, Lanzhou 730000, People's Republic of China. <sup>30</sup> Institute of Physics and Technology, Peace Avenue 54B, Ulaanbaatar 13330, Mongolia. <sup>31</sup> Instituto de Alta Investigación, Universidad de Tarapacá, Casilla 7D, Arica, Chile. <sup>32</sup> Jilin University, Changchun 130012, People's Republic of China. <sup>33</sup> Johannes Gutenberg University of Mainz, Johann-Joachim-Becher-Weg 45, D-55099 Mainz, Germany. <sup>34</sup> Joint Institute for Nuclear Research, 141980 Dubna, Moscow region, Russia. <sup>35</sup> Justus-Liebig-Universität Giessen, II. Physikalisches Institut, Heinrich-Buff-Ring 16, D-35392 Giessen, Germany. <sup>36</sup> Lanzhou University, Lanzhou 730000, People's Republic of China. <sup>37</sup> Liaoning Normal University, Dalian 116029, People's Republic of China. <sup>38</sup> Liaoning University, Shenyang 110036, People's Republic of China. <sup>39</sup> Nanjing Normal University, Nanjing 210023, People's Republic of China. <sup>40</sup> Nanjing University, Nanjing 210093, People's Republic of China. <sup>41</sup> Nankai University, Tianjin 300071, People's Republic of China. <sup>42</sup> National Centre for Nuclear Research, Warsaw 02-093, Poland. <sup>43</sup> North China Electric Power University, Beijing 102206, People's Republic of China. <sup>44</sup> Peking University, Beijing 100871, People's Republic of China. <sup>45</sup> Qufu Normal University, Qufu 273165, People's Republic of China. <sup>46</sup> Shandong Normal University, Jinan 250014, People's Republic of China. <sup>47</sup> Shandong University, Jinan 250100, People's Republic of China. <sup>48</sup> Shanghai Jiao Tong University, Shanghai 200240, People's Republic of China. <sup>49</sup> Shanxi Normal University, Linfen 041004, People's Republic of China. <sup>50</sup> Shanxi University, Taiyuan 030006, People's Republic of China. <sup>51</sup> Sichuan University, Chengdu 610064, People's Republic of China. <sup>52</sup> Soochow University, Suzhou 215006, People's Republic of China. <sup>53</sup> South China Normal University, Guangzhou 510006, People's Republic of China. <sup>54</sup> Southeast University, Nanjing 211100, People's Republic of China. <sup>55</sup> State Key Laboratory of Particle Detection and Electronics, Beijing 100049, Hefei 230026, People's Republic of China. <sup>56</sup> Sun Yat-Sen University, Guangzhou 510275, People's Republic of China. <sup>57</sup> Suranaree University of Technology, University Avenue 111, Nakhon Ratchasima 30000, Thailand. <sup>58</sup> Tsinghua University, Beijing 100084, People's Republic of China. <sup>59</sup> Turkish Accelerator Center Particle Factory Group, (A)Istinye University, 34010, Istanbul, Turkey; (B)Near East University, Nicosia, North Cyprus, Mersin 10, Turkey. <sup>60</sup> University of Chinese Academy of Sciences, Beijing 100049, People's Republic of China. <sup>61</sup> University of Groningen, NL-9747 AA Groningen, The Netherlands. <sup>62</sup> University of Hawaii, Honolulu, Hawaii 96822, USA. <sup>63</sup> University of Jinan, Jinan 250022, People's Republic of China. <sup>64</sup> University of Manchester, Oxford Road, Manchester, M13 9PL, United Kingdom. <sup>65</sup> University of Muenster, Wilhelm-Klemm-Strasse 9, 48149 Muenster, Germany. <sup>66</sup> University of Oxford, Keble Road, Oxford OX13RH, United Kingdom. <sup>67</sup> University of Science and Technology Liaoning, Anshan 114051, People's Republic of China. <sup>68</sup> University of Science and Technology of China, Hefei 230026, People's Republic of China. <sup>69</sup> University of South China, Hengyang 421001, People's Republic of China. <sup>70</sup> University of the Punjab, Lahore-54590, Pakistan. <sup>71</sup> University of Turin and INFN, (A)University of Turin, I-10125, Turin, Italy; (B)University of Eastern Piedmont, I-15121, Alessandria, Italy; (C)INFN, I-10125, Turin, Italy. <sup>72</sup> Uppsala University, Box 516, SE-75120 Uppsala, Sweden. <sup>73</sup> Wuhan University, Wuhan 430072, People's Republic of China. <sup>74</sup> Xinyang Normal University, Xinyang 464000, People's Republic of China. <sup>75</sup> Yantai University, Yantai 264005, People's Republic of China. <sup>76</sup> Yunnan University, Kunming 650500, People's Republic of China. <sup>77</sup> Zhejiang University, Hangzhou 310027, People's Republic of China. <sup>78</sup> Zhengzhou University, Zhengzhou 450001, People's Republic of China. <sup>a</sup> Also at the Moscow Institute of Physics and Technology, Moscow 141700, Russia. <sup>b</sup> Also at the Novosibirsk State University, Novosibirsk, 630090, Russia. <sup>c</sup> Also at the NRC "Kurchatov Institute", PNPI, 188300, Gatchina, Russia. <sup>d</sup> Also at Goethe University Frankfurt, 60323 Frankfurt am Main, Germany. <sup>e</sup> Also at Key Laboratory for Particle Physics, Astrophysics and Cosmology, Ministry of Education; Shanghai Key Laboratory for Particle Physics and Cosmology; Institute of Nuclear and Particle Physics, Shanghai 200240, People's Republic of China. <sup>f</sup> Also at Key Laboratory of Nuclear Physics and Ion-beam Application (MOE) and Institute of Modern Physics, Fudan University, Shanghai 200443, People's Republic of China. <sup>g</sup> Also at State Key Laboratory of Nuclear Physics and Technology, Peking University, Beijing 100871, People's

Republic of China. <sup>h</sup> Also at School of Physics and Electronics, Hunan University, Changsha 410082, China. <sup>i</sup> Also at Guangdong Provincial Key Laboratory of Nuclear Science, Institute of Quantum Matter, South China Normal University, Guangzhou 510006, China. <sup>j</sup> Also at Frontiers Science Center for Rare Isotopes, Lanzhou University, Lanzhou 730000, People's Republic of China. <sup>k</sup> Also at Lanzhou Center for Theoretical Physics, Lanzhou University, Lanzhou 730000, People's Republic of China. <sup>l</sup> Also at the Department of Mathematical Sciences, IBA, Karachi , Pakistan.
